# Supplementary material
Source: PubMed Central journal article supplement (PMC6124643)
Supplement: NIHMS77239-supplement-Appendix_2.pdf [file NIHMS77239-supplement-Appendix_2.pdf]

**Appendix 2: Assessment as usual (N = 10 sites).**

| <b>Method of Assessment</b>     | <b>Site Frequency (%)</b> |
|---------------------------------|---------------------------|
| Parent interview                | 10 (100)                  |
| Young person interview          | 9 (90)                    |
| Conners' Parent & Teacher scale | 7 (70)                    |
| SDQ Parent                      | 7 (70)                    |
| SDQ Teacher                     | 4 (40)                    |
| QbTest                          | 5 (50)                    |
| Own school questionnaire form   | 2 (20)                    |
| School observation              | 2 (20)                    |
| ASEBA                           | 1 (10)                    |
| DAWBA                           | 10 (10)                   |

*Note.* ASEBA = Achenbach System of Empirically Based Assessment. DAWBA = Development and Well Being Assessment.

SDQ = Strengths and Difficulties Questionnaire. One site (Northern Ireland) did not complete the assessment as usual questionnaire.
